# Supplementary material for: Sex differences in sensory processing in children with autism spectrum disorder
Source: PubMed Central journal article supplement — Autism Res. 2021 Jul 20;14(11):2412–23. doi: 10.1002/aur.2580 (PMC9290069; doi:10.1002/aur.2580), 2021-07-20
Supplement: AUR-14-2412-s001.pdf [file AUR-14-2412-s001.pdf]

*Supplementary Table S1 – Age, gender and socio-economic distributions of the TD and ASD samples for SPM-P and SPM Home Forms*

|                                        | SPM-Preschool       |                     | SPM                 |                     |
|----------------------------------------|---------------------|---------------------|---------------------|---------------------|
|                                        | TD (N=152)<br>N (%) | ASD (N=88)<br>N (%) | TD (N=258)<br>N (%) | ASD (N=60)<br>N (%) |
| <b>Gender</b>                          |                     |                     |                     |                     |
| Male                                   | 83 (54.6)           | 75 (85.2)           | 128 (49.6)          | 47 (78.3)           |
| Female                                 | 69 (45.4)           | 13 (14.8)           | 130 (50.4)          | 13 (14.8)           |
| <b>Age in years: months</b>            |                     |                     |                     |                     |
| 2:0 – 2:11                             | 55 (36.2)           | 36 (40.9)           | -                   | -                   |
| 3:0 – 3:11                             | 50 (32.9)           | 26 (29.5)           | -                   | -                   |
| 4:0 – 4:11                             | 47 (30.9)           | 26 (29.5)           | -                   | -                   |
| 5:0 – 6:11                             | -                   | -                   | 94 (36.4)           | 23 (38.3)           |
| 7:0 – 8:11                             | -                   | -                   | 77 (29.8)           | 15 (25.0)           |
| 9:0 – 10:11                            | -                   | -                   | 48 (18.6)           | 10 (16.7)           |
| 11:0 – 12:11                           | -                   | -                   | 39 (15.1)           | 12 (20.0)           |
| <b>Ethnicity</b>                       |                     |                     |                     |                     |
| Caucasian                              | 137 (90.7)          | 51 (76.1)           | 216 (83.7)          | 41 (82.0)           |
| African                                | 1 (0.7)             | 8 (11.9)            | 5 (0.8)             | 5 (10.0)            |
| South American                         | 2 (1.3)             | 2 (3.0)             | 1 (0.4)             | 2 (4.0)             |
| Asian                                  | 1 (0.7)             | 1 (1.5)             | 1 (0.4)             | 1 (2.0)             |
| Mixed                                  | 5 (3.3)             | 3 (4.5)             | 20 (7.8)            | 0 (0.0)             |
| Other                                  | 5 (3.3)             | 2 (3.0)             | 18 (7.0)            | 1 (2.0)             |
| <b>Parent's educational level</b>      |                     |                     |                     |                     |
| Apprentissage ou école professionnelle | 10 (6.6)            |                     | 29 (11.2)           |                     |
| Gymnase ou baccalauréat                | 10 (6.6)            |                     | 20 (7.8)            |                     |
| Bachelor                               | 35 (23.2)           |                     | 57 (22.1)           |                     |
| Master                                 | 65 (43.1)           |                     | 97 (37.6)           |                     |
| Doctorat                               | 31 (20.5)           |                     | 51 (19.8)           |                     |

Supplementary Figure 1

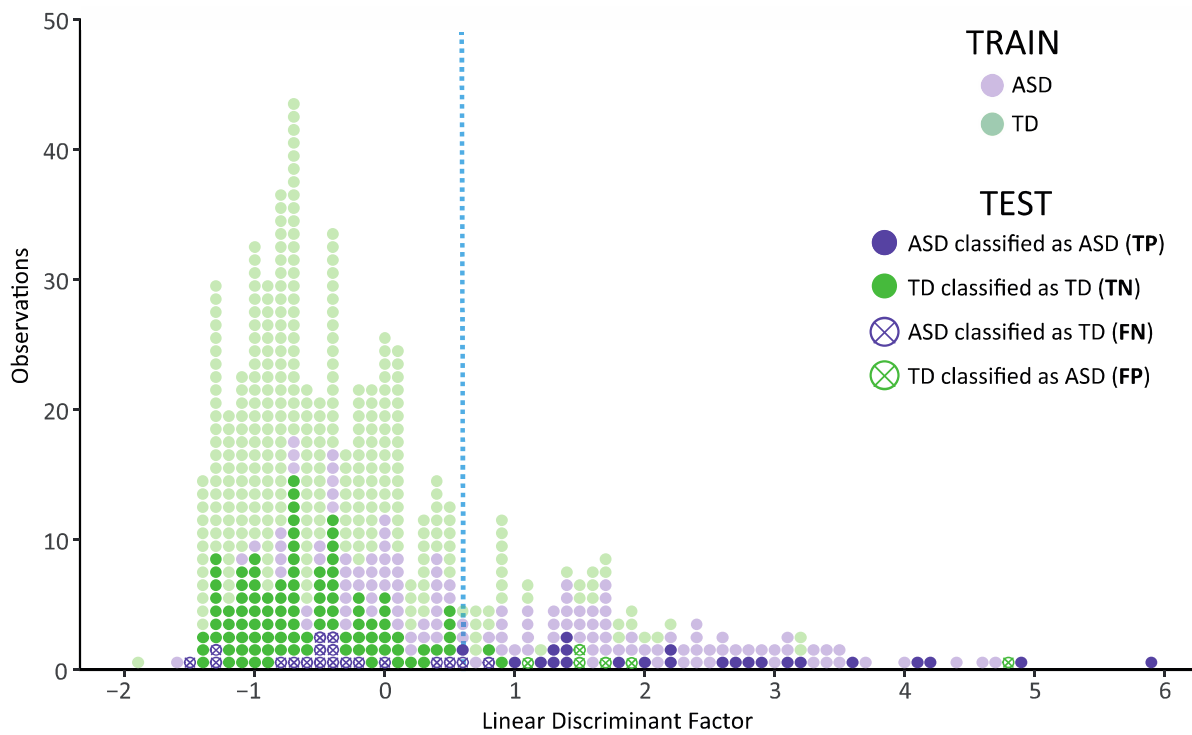

Dotplot displaying the number of individual observations (purple for ASD, green for TD) across the linear discriminant factor generated with the six sensory subscales. Translucent dots correspond to the training dataset, opaque dots correspond to the test subset. Individuals for which the LDA wrongly estimated their membership to a group are displayed with a cross. LDA cutoff is displayed with a blue dotted line. *TP*, true positive; *TN*, true negative; *FN*, false negative; *FP*, false positive.
